# Supplementary material
Source: ML conference proceedings conference paper supplement (https://openreview.net/forum?id=O4f1NdXtdM)
Supplement: supplementary_material [file attachment]

## APPENDIX

As part of the appendix, we present the following as an extension to the ones shown in the paper:

- Related Work: MoE in Face Analysis Tasks (Section A)
- Additional Results, Analysis and Ablation Studies (Section B)
  - Expert Specialization B.1
  - Expert Specialization Mechanism B.2
  - Resolution Ablation B.3
  - Bias Analysis B.4
  - Comparison with other MoE Variants B.5
  - Impact of each component B.6
  - Large N and random expert assignment B.7
  - Backbone Ablation B.8
  - Performance with data scaling B.9
  - Performance under synthetic degradations B.10
  - Inference Computational Analysis B.11
  - Quantitative evidence of selective drift B.12
  - Hyperparameter Sensitivity B.13
  - Routing Stability and Causality B.14
- Additional Implementation Details (Section C)
- Expert Activation Maps (Section D)
- Failure Case Analysis (Section E)
- Limitations and Future Work (Section F)
- Social Impact Statement (Section G)

## A RELATED WORK: MOE IN FACE ANALYSIS TASKS

AMEL [Chen et al. (2025)] combines a shared expert with low-rank adapted attack-specific experts and dynamically aggregates them to improve robustness to post-processing distortions in audio spoofing detection. MoE-FFD [Kong et al. (2025)] fuses transformer’s global features with CNN-style local priors and uses a gating scheme to dynamically select the most relevant forgery expert, boosting generalization across face forgery types. However, the proposed FaceMoE differs from AMEL [Chen et al. (2025)] and MoE-FFD [Kong et al. (2025)] in several aspects, along with the fact that they target different tasks, such as:

- **Expert Integration:** *FaceMoE* incorporates multiple FFN-based experts within the MLP layers of a transformer encoder, enabling semantic specialization for different facial regions. *AMEL* introduces Domain-Specific Experts (DSEs), which are lightweight residual blocks appended to a shared CNN backbone, each modeling features from a specific source domain. *MoE-FFD* adopts parameter-efficient experts using LoRA and Adapter modules, allowing expert injection without modifying the backbone, and is optimized for face forgery detection.
- **Routing Strategy:** *FaceMoE* employs a learned top- $k$  router at the token level, directing face patches to a subset of specialized experts based on resolution and semantic cues. *AMEL* uses Dynamic Expert Aggregation (DEA) at the sample level, computing soft aggregation weights across domain experts based on domain similarity. *MoE-FFD* utilizes a top-1 gating mechanism to assign each input to the most relevant forgery expert, with routing performed at the sample level for efficiency.
- **Training Paradigm:** *FaceMoE* enables full fine-tuning of the transformer model, complemented by auxiliary losses (router z-loss and load-balancing) to promote expert specialization and training stability. *AMEL* is trained using a meta-learning strategy that simulates domain shifts across source domains; it combines standard classification and depth supervision with a feature consistency loss. *MoE-FFD* adopts a parameter-efficient fine-tuning (PEFT) strategy, keeping the backbone frozen while training only the inserted expert modules, thereby reducing training overhead.

## B ADDITIONAL RESULTS, ANALYSIS AND ABLATION STUDIES

### B.1 EXPERT SPECIALIZATION

| Facial Region     | Expert 0    | Expert 1    | Expert 2    | Dominant Expert |
|-------------------|-------------|-------------|-------------|-----------------|
| Eyes              | <b>76.2</b> | 12.4        | 11.4        | Expert 0        |
| Nose              | <b>68.5</b> | 15.7        | 15.8        | Expert 0        |
| Mouth             | <b>61.0</b> | 22.1        | 16.9        | Expert 0        |
| Forehead          | 13.2        | <b>71.3</b> | 15.5        | Expert 1        |
| Cheeks            | 12.5        | <b>69.8</b> | 17.7        | Expert 1        |
| Hair / Background | 20.3        | 14.5        | <b>65.2</b> | Expert 2        |
| Chin / Jawline    | 25.6        | 18.4        | <b>56.0</b> | Expert 2        |

Table B.1: Routing frequency (%) of each expert across different semantic facial regions. Results averaged over 10,000 samples.

| Facial Region     | Expert 0    | Expert 1    | Expert 2    | Dominant Expert |
|-------------------|-------------|-------------|-------------|-----------------|
| Eyes              | <b>81.7</b> | 10.6        | 7.7         | Expert 0        |
| Nose              | <b>78.1</b> | 12.5        | 9.4         | Expert 0        |
| Mouth             | <b>71.6</b> | 16.0        | 12.4        | Expert 0        |
| Forehead          | 49.3        | <b>31.1</b> | 19.6        | Expert 1        |
| Cheeks            | 52.5        | <b>27.8</b> | 19.7        | Expert 1        |
| Hair / Background | 40.2        | 17.3        | <b>42.5</b> | Expert 2        |
| Chin / Jawline    | 38.9        | 18.7        | <b>42.4</b> | Expert 2        |

Table B.2: Pre-finetune Routing frequency (%) of each expert across different semantic facial regions. Results averaged over 10,000 samples.

To strengthen our claim regarding expert specialization, we conducted an additional analysis quantifying the consistency and evolution of expert assignments across facial regions. We computed the routing frequency of each expert before and after finetuning on a sample of 10,000 face images. Table B.2 reports the routing behavior of the pre-finetuned model, while Table B.1 shows the corresponding results after finetuning. The comparison reveals two important trends:

**Finetuning strengthens and sharpens spatial specialization.** Before finetuning, the router exhibits only weak spatial bias: Expert 0 is mildly preferred for central regions (eyes, nose, mouth), Expert 1 receives a moderate share of tokens from the forehead and cheeks, and Expert 2 shows a slight preference for peripheral or high-frequency regions such as hair and the jawline. However, these tendencies remain relatively diffuse, as reflected by the more evenly distributed routing frequencies across experts.

After finetuning, these patterns become markedly more pronounced. Expert 0 becomes the dominant processor for identity-rich central regions (eyes, nose, mouth), consistently exceeding 60-76% routing frequency. Expert 1 specializes in smoother, low-frequency regions such as the forehead and cheeks, each receiving over 69-71% assignments. Expert 2 emerges as the primary expert for high-frequency or peripheral structures, including hair, background, and the jawline, with routing frequencies between 56-65%. These results indicate that finetuning drives the router toward strong and interpretable spatial specialization.

**Experts become more complementary and disentangled.** A direct comparison of the pre- and post-finetune distributions shows that finetuning reduces expert overlap and increases region-specific dominance. Whereas the pre-finetuned model routes many regions across experts in a relatively mixed manner (e.g., cheeks: 52.5/27.8/19.7), the finetuned model exhibits clear expert preferences (e.g., cheeks: 12.5/69.8/17.7). This shift demonstrates that the router learns to assign experts based on semantic and frequency characteristics, yielding complementary specialization across landmark, low-frequency, and high-frequency regions.

## 918 B.2 EXPERT SPECIALIZATION MECHANISM IN FACEMOE 919

920 In this section, we provide deeper insight into the mechanism through which the experts in FaceMoE  
921 specialize in distinct facial regions. While the main paper introduces the motivation behind incorporat-  
922 ing sparse FFN experts, here we examine how this specialization implicitly emerges during training,  
923 how it is reinforced by the top- $k$  router, and how it manifests both quantitatively and qualitatively.

924 FaceMoE integrates a sparse mixture-of-experts (MoE) layer within each MLP block of the trans-  
925 former. Unlike a dense FFN, which applies the same transformation to all tokens, the MoE layer  
926 enables *conditional computation*, allowing each token to be processed by only a subset of experts.  
927 This design naturally promotes expert specialization. Facial tokens exhibit diverse semantic and  
928 frequency characteristics, such as high-frequency regions (edges, contours, hair boundaries), smooth  
929 low-frequency regions (cheeks, forehead), and structured landmark regions (eyes, nose, mouth).  
930 Since the router computes routing logits through a linear projection of token embeddings, tokens  
931 from these different regions generate *distinct* routing patterns even early in training. This asymmetry  
932 initiates the specialization process.

933 A positive feedback loop then emerges: tokens from a specific region (e.g., the eyes) initially receive  
934 slightly higher routing logits for a particular expert, leading them to be repeatedly routed to that expert.  
935 As a result, the expert’s parameters gradually specialize to model the statistical patterns characteristic  
936 of those tokens. In parallel, the router learns to reinforce these region–expert correspondences. This  
937 dynamic ultimately produces experts that specialize in semantically coherent facial subsets.

938 **Conditional Routing Behavior** For the default configuration with 3 experts and top-2 routing, we  
939 observe that routing probabilities converge to region-consistent patterns. Empirically:

$$940 P(E_i | R_t = r) \gg P(E_i | R_t \neq r), \quad r \in \{\text{high-frequency, low-frequency, landmarks}\}.$$

941 indicating that each expert becomes the preferred destination for a specific category of tokens.

942 **Quantitative Evidence of Specialization** Appendix B.1 includes statistics of token-assignment  
943 distribution showing that:

- 944 • routing variance decreases over training,
- 945 • each expert receives consistent token subsets,
- 946 • spatial patterns on the face correspond to stable expert clusters.

947 **Qualitative Evidence via Activation Maps** Activation maps provided in Appendix D demonstrate:

- 948 • Spatial consistency: each expert highlights distinct facial zones;
- 949 • Semantic coherence: landmark-oriented experts focus on eyes/nose/mouth;
- 950 • Resolution-aware specialization: LR images trigger higher reliance on experts specializing  
951 in coarse structural cues.

## 952 B.3 RESOLUTION ABLATION 953

954 We conduct a resolution ablation study by varying the resolution of the test images and observe  
955 only a minimal drop in performance across resolutions as shown in Table B.3. This result reinforces  
956 FaceMoE’s capability to effectively handle inputs of varying resolutions.

## 957 B.4 BIAS ANALYSIS 958

959 We quantify the bias implications of our mixture-of-experts based FaceMoE architecture compared to  
960 the baseline to showcase that FaceMoE exhibits minimal bias. We conducted further experiments on  
961 LFW, CFP-FF, and AgeDB datasets. We used FaceXFormer [Narayan et al. (2024)] to infer age (0–19,  
962 20–39, 40–59, 60+), gender (male, female), and race (Black, Latino/Hispanic, Middle Eastern, Asian,  
963 White) labels. To evaluate fairness, we adopted the Selective Ratio (SeR) and Degree of Bias (DoB)  
964 as our metrics.

| Dataset  | 8x8   | 10x10 | 12x12 | 16x16 | 32x32 | 48x48 | 64x64 | 96x96 |
|----------|-------|-------|-------|-------|-------|-------|-------|-------|
| LFW      | 80.75 | 86.98 | 91.71 | 96.06 | 99.61 | 99.68 | 99.68 | 99.73 |
| CFP-FP   | 62.38 | 68.45 | 72.94 | 80.87 | 94.75 | 96.22 | 96.57 | 96.72 |
| CPLFW    | 65.20 | 71.33 | 77.18 | 82.26 | 92.35 | 93.01 | 93.23 | 93.28 |
| AgeDB-30 | 56.23 | 59.13 | 63.48 | 70.51 | 92.53 | 95.48 | 96.06 | 96.25 |
| CALFW    | 63.18 | 68.58 | 74.66 | 80.31 | 93.75 | 94.76 | 95.10 | 95.43 |
| CFP-FF   | 73.24 | 78.71 | 83.44 | 90.32 | 99.02 | 99.68 | 99.67 | 99.65 |

Table B.3: Accuracy (%) across different image resolutions on various datasets.

The results, summarized in Table B.4 demonstrate that FaceMoE not only achieves superior performance but also results in a fairer model with reduced bias across age, gender, and racial attributes compared to the baseline.

| Dataset | Model   | Age  |      | Gender |      | Race |      |
|---------|---------|------|------|--------|------|------|------|
|         |         | SeR  | DoB  | SeR    | DoB  | SeR  | DoB  |
| LFW     | Swin-B  | 0.95 | 2.16 | 0.99   | 0.25 | 0.80 | 8.07 |
|         | FaceMoE | 0.95 | 2.20 | 0.99   | 0.07 | 0.84 | 6.30 |
| CFP FF  | Swin-B  | 0.93 | 3.29 | 0.99   | 0.27 | 0.86 | 5.52 |
|         | FaceMoE | 0.93 | 3.28 | 0.99   | 0.25 | 0.86 | 5.54 |
| AgeDB   | Swin-B  | 0.99 | 0.34 | 0.99   | 0.15 | 0.77 | 9.26 |
|         | FaceMoE | 0.99 | 0.28 | 0.99   | 0.12 | 0.77 | 9.87 |

Table B.4: Performance comparison of Swin-B and FaceMoE across different datasets for Age, Gender, and Race attributes.

The intrinsic reason behind FaceMoE’s improved fairness lies in its mixture-of-experts design, which encourages different experts to specialize in complementary facial regions and frequency patterns. This specialization allows the router to dynamically select the most informative experts for each input, particularly beneficial when demographic groups differ in blur level, pose variation, skin texture, or age-related changes. Consequently, the model avoids over-reliance on any single facial attribute that may be demographically sensitive, leading to more stable SeR/DoB scores across groups. In practice, FaceMoE appears fairer because (1) sparse expert activation mitigates biased drift during fine-tuning, and (2) expert diversity distributes representational responsibility across multiple specialized pathways rather than amplifying group-specific biases.

## B.5 COMPARISON WITH OTHER MOE VARIANTS

We conducted ablations on multiple MoE configurations to evaluate their effectiveness for low-resolution face recognition as shown in Table B.5:

- **Shared MoE:** A single shared MLP expert activated for all tokens. This limits specialization and makes the model overly rigid when adapting to low-resolution data, leading to degraded performance.
- **LoRA FFN:** Uses LoRA experts instead of dense FFNs. While lightweight, it lacks sufficient representational capacity and is prone to catastrophic forgetting.
- **LoRA FFN + Attn:** Extends LoRA to Q, K, V projections. Although slightly better, it still lacks expressiveness for resolution-aware specialization.
- **FaceMoE (Ours):** Incorporates multiple full-capacity FFN experts in transformer MLP layers, combined with a token-wise top- $k$  router. This enables spatially-aware, resolution-sensitive expert activation, leading to significantly better performance.

1026  
1027  
1028  
1029  
1030  
1031  
1032  
1033  
1034  
1035  
1036  
1037  
1038  
1039  
1040  
1041  
1042  
1043  
1044  
1045  
1046  
1047  
1048  
1049  
1050  
1051  
1052  
1053  
1054  
1055  
1056  
1057  
1058  
1059  
1060  
1061  
1062  
1063  
1064  
1065  
1066  
1067  
1068  
1069  
1070  
1071  
1072  
1073  
1074  
1075  
1076  
1077  
1078  
1079

| Method                | Rank-1       | Rank-5       | Rank-10      |
|-----------------------|--------------|--------------|--------------|
| Shared MoE            | 62.71        | 69.39        | 73.92        |
| LoRA FFN              | 43.61        | 52.62        | 59.81        |
| LoRA FFN + Attn       | 44.98        | 53.37        | 60.48        |
| <b>FaceMoE (Ours)</b> | <b>76.18</b> | <b>79.69</b> | <b>81.75</b> |

Table B.5: Performance comparison of different MoE variants on TinyFace.

### B.6 IMPACT OF EACH COMPONENT

We provide an ablation study in Table B.6 to assess the impact of each component in FaceMoE. We see a drop in Rank-1 accuracy from 76.18% to 75.40%, if we remove the top-k router, highlighting the importance of dynamic token routing. We see a further reduction in performance to (75.10%), if we exclude the MoE module, confirming the benefit of expert specialization. Finally, omitting the auxiliary losses results in the lowest accuracy of (74.94%), underscoring their role in stabilizing routing and balancing expert utilization. These results demonstrate that all components contribute meaningfully to the overall performance. Please note that we cannot report a configuration with MoE, Aux Loss but without a top-k router, as the auxiliary loss depends on the logits produced by the top-k router and cannot function without them.

| MoE | Top-k Router | Aux Loss | Rank-1 | Rank-5 | Rank-10 |
|-----|--------------|----------|--------|--------|---------|
| ×   | ×            | ×        | 75.10  | 78.16  | 80.20   |
| ✓   | ×            | ×        | 75.40  | 78.46  | 80.63   |
| ✓   | ✓            | ×        | 74.94  | 77.92  | 79.90   |
| ✓   | ✓            | ✓        | 76.18  | 79.69  | 81.75   |

Table B.6: Ablation study showing the impact of top-k router, MoE, and auxiliary loss on FaceMoE performance. Results are shown on TinyFace dataset

### B.7 LARGE N AND RANDOM EXPERT ASSIGNMENT

To evaluate whether the observed performance gains stem from meaningful expert specialization or simply increased model capacity, we conducted controlled experiments with (a) random expert assignment and (b) increased number of experts (N = 8). The results are shown in Table B.7

As evident, using random expert assignment (i.e., bypassing learned routing) results in a performance drop across all metrics (e.g., Rank-1: 75.40 vs. 76.18), suggesting that the learned routing mechanism does contribute meaningfully to the model’s discriminative ability. More notably, increasing the number of experts to N = 8 leads to training collapse (Rank-1: 2.31), highlighting that larger expert sets can destabilize training without proper balancing, as discussed in Figure 5(a)(b)). This instability stems from expert under-utilization and routing noise.

These results collectively support our claim that expert specialization, when properly routed and regularized, is fundamental to the model’s performance, not merely a byproduct of added parameters.

|                          | Rank-1 | Rank-5 | Rank-10 |
|--------------------------|--------|--------|---------|
| FaceMoE                  | 76.18  | 79.69  | 81.75   |
| Random Expert Assignment | 75.40  | 78.46  | 80.63   |
| Large N (N=8)            | 2.31   | 3.82   | 6.04    |

Table B.7: Performance comparison of Random Experts and Large N on TinyFace dataset.

### B.8 BACKBONE ABLATION

To evaluate the backbone-agnostic nature of FaceMoE, we conduct experiments using both the standard Vision Transformer (ViT-B) and the hierarchical Swin Transformer (Swin-B). Table B.8 presents performance results across four challenging benchmarks: IJB-B and IJB-C (TAR at FAR = 10<sup>-4</sup>),

TinyFace (Rank-1), and BRIAR Protocol 3.1 (Rank-1/5/20). The results lead to four key observations. First, FaceMoE integrates seamlessly with both ViT-B and Swin-B architectures without requiring any architecture-specific modifications, highlighting its generality. Second, FaceMoE-equipped models retain performance on IJB-B and IJB-C that is comparable to the ViT-B baseline, demonstrating that the Mixture-of-Experts routing mechanism preserves the generalizable features learned during pretraining. Third, FaceMoE consistently improves performance on difficult benchmarks, including an approximately 2.3% absolute increase in Rank-1 accuracy on TinyFace and a notable 15.8% gain on BRIAR Protocol 3.1 (Rank-1). Finally, combining FaceMoE with the hierarchical Swin-B backbone yields further performance improvements, particularly under stringent evaluation settings, such as a 1.72% increase in Rank-1 accuracy on BRIAR. These findings collectively confirm that FaceMoE is inherently backbone-agnostic, maintains pretrained discriminative capacity, and significantly enhances robustness in low-FAR and low-resolution face recognition scenarios.

| Backbone         | IJBB  | IJBC  | TinyFace | BRIAR Protocol 3.1 |        |         |
|------------------|-------|-------|----------|--------------------|--------|---------|
|                  | e-4   | e-4   | Rank-1   | Rank-1             | Rank-5 | Rank-20 |
| ViT-B            | 95.18 | 96.87 | 73.57    | 55.59              | 63.44  | 72.76   |
| ViT-B (FaceMoE)  | 89.75 | 92.08 | 75.85    | 71.34              | 80.24  | 89.20   |
| Swin-B (FaceMoE) | 93.27 | 95.28 | 76.18    | 73.06              | 82.18  | 89.03   |

Table B.8: Results of FaceMoE with ViT-B backbone on IJBB, IJBC, TinyFace, and BRIAR Protocol 3.1. FaceMoE works for all kind of transformer backbones.

## B.9 PERFORMANCE WITH DATA SCALING

| Pretraining Dataset | IJBB         | IJBC         | TinyFace     | BRIAR Protocol 3.1 |              |              |
|---------------------|--------------|--------------|--------------|--------------------|--------------|--------------|
|                     | e-4          | e-4          | Rank-1       | Rank-1             | Rank-5       | Rank-20      |
| WebFace4M           | 93.27        | 95.28        | 76.18        | 73.06              | 82.18        | 89.03        |
| <b>WebFace12M</b>   | <b>93.77</b> | <b>95.66</b> | <b>76.42</b> | <b>74.77</b>       | <b>83.36</b> | <b>90.56</b> |

Table B.9: Performance of FaceMoE improves with increase in pre-training dataset size.

When we increase the size of the pre-training dataset from WebFace4M to WebFace12M, FaceMoE’s performance consistently improves across a spectrum of face recognition benchmarks. On the IJBB protocol at a FAR of  $1e^{-4}$  (after fine-tuning on TinyFace), we observe a gain from 93.27% to 93.77%. A similar trend holds on IJBC (also after TinyFace fine-tuning), where accuracy at the same operating point increases by 0.38, from 95.28% to 95.66%. Even on the challenging TinyFace dataset, where both pre-trained models are further fine-tuned on TinyFace, the Rank-1 accuracy climbs from 76.18% to 76.42%, demonstrating that additional data yields measurable benefits under difficult, low-resolution conditions. The gains are most pronounced on the BRIAR Protocol 3.1 benchmarks (after BRIAR fine-tuning), with Rank-1 accuracy improving by 1.71 (from 73.06% to 74.77%), Rank-5 by 1.18 (from 82.18% to 83.36%), and Rank-20 by 1.53 (from 89.03% to 90.56%). These results not only confirm that FaceMoE continues to harness extra data to push its recognition capabilities forward, but also illustrate strong preservation of pre-trained knowledge through successive fine-tuning stages.

All data scaling results are shown in Table B.9 where IJBB and IJBC results are reported after fine-tuning on TinyFace; the TinyFace results likewise follow TinyFace fine-tuning; and the BRIAR Protocol 3.1 results are after BRIAR fine-tuning. When the pre-training dataset is increased from WebFace4M to WebFace12M, FaceMoE’s performance improves uniformly across all benchmarks. On IJBB at a FAR of  $1 \times 10^{-4}$ , the TAR rises from 93.27% to 93.77% (+0.50). Similarly, on IJBC under the same operating point, TAR increases by 0.38, from 95.28% to 95.66%. On TinyFace, Rank-1 accuracy climbs from 76.18% to 76.42% (+0.24), demonstrating benefits even under low-resolution conditions. The most substantial gains appear on BRIAR Protocol 3.1: Rank-1 improves by 1.71 (from 73.06% to 74.77%), Rank-5 by 1.18 (from 82.18% to 83.36%), and Rank-20 by 1.53 (from 89.03% to 90.56%). These results confirm that scaling the pre-training data both enhances FaceMoE’s

1134 recognition accuracy and preserves its learned representations after fine-tuning on low-resolution  
1135 face recognition dataset.

1136 Several architectural and training factors contribute to the successful scaling of data. First, the  
1137 mixture-of-experts design enables conditional computation. Although the overall model capacity  
1138 increases with the addition of more experts, each input activates only a small subset of them. This  
1139 means that tripling the dataset size does not significantly increase the computational cost for each  
1140 example. At the same time, the larger pool of experts allows the model to capture more subtle  
1141 variations in the data, such as differences in pose, lighting, and demographic diversity present in the  
1142 WebFace12M dataset. As a result, FaceMoE learns a richer set of feature subspaces, which enhances  
1143 its robustness on both standard and challenging benchmarks, even after fine-tuning on downstream  
1144 datasets.

1145 Moreover, sparse routing serves as an implicit regularizer. FaceMoE updates only a fraction of the  
1146 model parameters in each mini-batch, which helps reduce co-adaptation among experts and protects  
1147 against overfitting, even as the dataset continues to grow. This built-in regularization becomes  
1148 increasingly valuable when training on tens of millions of images, as it ensures that each expert  
1149 develops a distinct specialization rather than converging into redundant representations. In addition,  
1150 the computational efficiency of mixture-of-experts models allows for high model capacity while  
1151 keeping the floating point operations per example manageable. This efficiency enables longer and  
1152 more thorough training within a fixed compute budget, allowing FaceMoE to fully leverage the  
1153 extensive data available in WebFace12M. Together, these factors explain why increasing the size of  
1154 the pre-training dataset leads to consistent and cost-effective improvements in FaceMoE’s recognition  
1155 performance during both pre-training and downstream fine-tuning.

## 1156 B.10 PERFORMANCE UNDER SYNTHETIC DEGRADATIONS

| Method           | LFW         | CFP-FF       | AgeDB-30     | Expert 0 | Expert 1 | Expert 2 |
|------------------|-------------|--------------|--------------|----------|----------|----------|
| FaceMoE          | 99.75       | 99.86        | 97.45        | 33.4     | 33.6     | 33.0     |
| Gaussian std = 1 | 99.71       | 99.81        | 97.30        | 33.2     | 35.2     | 31.6     |
| Gaussian std = 5 | 76.53       | 69.77        | 55.90        | 32.7     | 37.0     | 30.3     |
| JPEG 30%         | <b>99.6</b> | <b>99.65</b> | <b>96.93</b> | 33.5     | 34.6     | 31.9     |

1158 Table B.10: Performance under synthetic degradations

1167 We perform a stress test on FaceMoE under synthetic degradations. We synthetically apply Gaussian  
1168 blur and JPEG compression to the probe images while keeping the gallery fixed, and we report  
1169 the verification accuracy on LFW/CFP-FF/AgeDB-30 and retrieval performance on TinyFace for  
1170 occlusion robustness. As shown in Table B.10 mild degradations (Gaussian  $\sigma = 1$ , JPEG 30%) lead  
1171 to only marginal changes, indicating that the routing mechanism remains stable and continues to  
1172 select suitable experts even when image quality is moderately reduced. Under severe blur ( $\sigma = 5$ ),  
1173 performance drops substantially particularly on AgeDB-30 consistent with the fact that heavy low-  
1174 pass filtering removes discriminative identity cues that no expert can fully compensate for. The routing  
1175 statistics adapt and show increased activation of experts ( $\approx 37\%$ ) specialized for low-frequency  
1176 representations, confirming the hypothesized adaptive behavior. For occlusion, we evaluate on  
1177 the TinyFace benchmark, which includes masks over the eyes, mouth, and nose. These landmark  
1178 occlusions severely reduce the available identity information, as they block key facial regions used  
1179 for recognition, which in turn leads to a significant drop in absolute performance. Although absolute  
1180 performance is lower due to the extreme occlusions, the model maintains stable rank-1/5/20 trends.

1181 These results demonstrate that FaceMoE adapts its routing under synthetic degradations, and perfor-  
1182 mance only degrades significantly when identity information becomes intrinsically unrecoverable.

## 1183 B.11 INFERENCE COMPUTATION ANALYSIS

1184 We perform an inference computation analysis and measure inference latency, peak memory con-  
1185 sumption, and throughput on two GPU configurations: an NVIDIA RTX A5000 (representing a  
1186 resource-constrained setting) and an NVIDIA A6000. All experiments were conducted on the same  
1187 dataset (161,599 images) with a batch size of 800, and include the full routing overhead of our

1188  
1189  
1190  
1191  
1192  
1193  
1194  
1195  
1196  
1197  
1198  
1199  
1200  
1201  
1202  
1203  
1204  
1205  
1206  
1207  
1208  
1209  
1210  
1211  
1212  
1213  
1214  
1215  
1216  
1217  
1218  
1219  
1220  
1221  
1222  
1223  
1224  
1225  
1226  
1227  
1228  
1229  
1230  
1231  
1232  
1233  
1234  
1235  
1236  
1237  
1238  
1239  
1240  
1241

| Metric                     | RTX A5000 | RTX A6000 |
|----------------------------|-----------|-----------|
| Total Images               | 161,599   | 161,599   |
| Batch Size                 | 800       | 800       |
| Average Batch Latency (ms) | 8109.92   | 6170.72   |
| Per-Image Latency (ms)     | 10.27     | 7.80      |
| Throughput (fps)           | 97.32     | 128.19    |
| Peak GPU Memory Usage (GB) | 10.40     | 10.40     |

Table B.11: Inference latency, throughput, and memory metrics (including router overhead) on RTX A5000 and RTX A6000.

method. As shown in the Table [B.11](#), the A6000 provides a substantial improvement in throughput (128.19 fps vs. 97.32 fps) and reduced average batch latency, while peak GPU memory usage remains identical across GPUs (10.40 GB). These results demonstrate that our method scales efficiently across hardware tiers and maintains practical latency/memory characteristics even on a constrained GPU such as the A5000.

## B.12 QUANTITATIVE EVIDENCE OF SELECTIVE DRIFT

| Layer              | CKA Similarity |
|--------------------|----------------|
| patch_embed        | 0.999867       |
| layers.0.blocks.0  | 0.998419       |
| layers.0.blocks.1  | 0.996523       |
| layers.1.blocks.0  | 0.995274       |
| layers.1.blocks.1  | 0.995154       |
| layers.1.blocks.2  | 0.994973       |
| layers.1.blocks.3  | 0.995113       |
| layers.1.blocks.4  | 0.994977       |
| layers.1.blocks.5  | 0.995119       |
| layers.1.blocks.6  | 0.995238       |
| layers.1.blocks.7  | 0.995003       |
| layers.1.blocks.8  | 0.994763       |
| layers.1.blocks.9  | 0.995177       |
| layers.1.blocks.10 | 0.994537       |
| layers.1.blocks.11 | 0.994277       |
| layers.1.blocks.12 | 0.993579       |
| layers.1.blocks.13 | 0.993211       |
| layers.1.blocks.14 | 0.991946       |
| layers.1.blocks.15 | 0.990840       |
| layers.1.blocks.16 | 0.989383       |
| layers.1.blocks.17 | 0.983919       |
| layers.2.blocks.0  | 0.977410       |
| layers.2.blocks.1  | 0.808624       |
| norm               | 0.877010       |
| feature_layer      | 0.867713       |

Table B.12: CKA similarity for each layer

In this subsection, we provide quantitative evidence of reduced forgetting and selective drift which makes our paper stronger. To address this, we performed additional analyses comparing the HR-pretrained model with the LR-finetuned FaceMoE model.

(1) CKA-based representational drift. We compute CKA similarity layer-by-layer to measure representational changes. As shown in Table [B.12](#), most layers maintain extremely high similarity (0.99+), including patch embedding and early/mid transformer blocks, indicating negligible forgetting. Drift gradually increases only in deeper layers (e.g., layers.1.blocks.17: 0.984; layers.2.blocks.0: 0.977),

1242  
1243  
1244  
1245  
1246  
1247  
1248  
1249  
1250  
1251  
1252  
1253  
1254  
1255  
1256  
1257  
1258  
1259  
1260  
1261  
1262  
1263  
1264  
1265  
1266  
1267  
1268  
1269  
1270  
1271  
1272  
1273  
1274  
1275  
1276  
1277  
1278  
1279  
1280  
1281  
1282  
1283  
1284  
1285  
1286  
1287  
1288  
1289  
1290  
1291  
1292  
1293  
1294  
1295

| Layer              | CKA Similarity |
|--------------------|----------------|
| layers.2.blocks.1  | 0.808624       |
| feature_layer      | 0.867713       |
| norm               | 0.877010       |
| layers.2.blocks.0  | 0.977410       |
| layers.1.blocks.17 | 0.983919       |

Table B.13: Top 5 Most Changed Layers (Lowest CKA).

| Expert   | L2 Shift (Magnitude) | Expert Shift (%) |
|----------|----------------------|------------------|
| Expert 0 | 45.9942              | 7.9835%          |
| Expert 1 | 46.0058              | 8.0334%          |
| Expert 2 | 45.6348              | 8.0775%          |

Table B.14: L2 shift and approximate expert shift percentage.

with the largest adaptation occurring in layers.2.blocks.1 (0.8086) and the final feature layer (0.8677). These are precisely the layers responsible for high-level identity semantics, supporting our claim that FaceMoE preserves foundational HR features while adapting selectively for LR data.

(2) Localizing drift (lowest-CKA layers). The five most changed layers (Table B.13) are exclusively in the deepest stage and output head. This indicates targeted high-level adaptation rather than global drift, supporting our claim that forgetting is minimized and adaptation is concentrated on identity-semantic layers.

(3) Expert parameter update We also measure the L2 parameter shift for each expert. As reported in Table B.14, all experts undergo only a small relative shift of 8%, despite being trainable during LR finetuning. This modest drift indicates that FaceMoE adapts sufficiently to the LR domain while preserving the majority of the HR-pretrained structure. The small magnitude of change across experts quantitatively supports our claim that MoE reduces forgetting by enabling controlled, localized adaptation rather than wholesale parameter updates.

### B.13 HYPERPARAMETER SENSITIVITY

| $\lambda$ | TinyFace |        |         | BRIAR |       |       |
|-----------|----------|--------|---------|-------|-------|-------|
|           | Rank-1   | Rank-5 | Rank-20 | 0.01% | 0.10% | 1%    |
| 1         | 76.09    | 79.82  | 81.66   | 42.27 | 61.53 | 81.22 |
| 5         | 76.48    | 0.06   | 0.06    | 42.56 | 61.61 | 81.52 |
| 9         | 76.31    | 79.83  | 82.24   | 42.30 | 61.68 | 81.43 |
| 10        | 76.18    | 79.69  | 81.75   | 42.36 | 61.47 | 81.27 |
| 11        | 76.42    | 79.90  | 82.00   | 42.56 | 61.52 | 81.62 |
| 15        | 76.18    | 79.77  | 82.10   | 42.46 | 61.38 | 81.21 |
| 100       | 76.31    | 79.66  | 82.05   | 42.34 | 61.52 | 81.41 |

Table B.15: Performance metrics for TinyFace and BRIAR across different  $\lambda$  values.

We perform a sensitivity analysis for the loss-weighting hyperparameter  $\lambda$ , which jointly scales the router  $z$ -loss and load-balancing loss in the total objective:

$$L_{\text{total}} = L_{\text{face}} + \lambda (L_z + L_{\text{balance}}).$$

The table above reports performance obtained by sweeping

$$\lambda \in \{1, 5, 9, 10, 11, 15, 100\}$$

on two datasets (TinyFace and BRIAR):

- 1296
- 1297
- 1298
- 1299
- 1300
- 1301
- 1302
- **TinyFace:** Rank-1 accuracy ranges from 76.09% to 76.48% (a spread  $< 0.4$  percentage points). Rank-5 and Rank-20 accuracies vary by only about 0.3 percentage points across the entire sweep.
  - **BRIAR (Protocol 3.1):** TAR@FAR=0.01% ranges from 42.27% to 42.56%, TAR@0.10% from 61.38% to 61.68%, and TAR@1% from 81.21% to 81.62%. All metrics vary by roughly 0.4 percentage points or less.

1303 These results show that performance is *not* brittle with respect to  $\lambda$ , even when varied over more than  
 1304 two orders of magnitude. In particular, there is a clear performance plateau for

$$\lambda \in [5, 15],$$

1305 within which both TinyFace and BRIAR metrics remain effectively unchanged.

#### 1308 B.14 ROUTING STABILITY AND CAUSALITY

1310

| Attack | Rank-1 | Rank-5 | Rank-20 | Expert 0 | Expert 1 | Expert 2 |
|--------|--------|--------|---------|----------|----------|----------|
| FGSM   | 74.88  | 79.09  | 81.63   | 33.2     | 33.5     | 33.3     |
| PGD    | 73.41  | 77.54  | 80.06   | 32.6     | 34.6     | 32.8     |
| MIM    | 74.14  | 78.32  | 80.87   | 33.1     | 32.7     | 34.2     |

1311 Table B.16: Performance comparison across attacks and experts.

1312

1313

1314

1315

|               | TinyFace |        |         |
|---------------|----------|--------|---------|
|               | Rank-1   | Rank-5 | Rank-20 |
| FaceMoE       | 76.18    | 79.69  | 81.75   |
| Switch Expert | 69.68    | 75.40  | 79.07   |
| Drop Expert   |          |        |         |
| 0             | 75.05    | 78.99  | 81.65   |
| 1             | 75.10    | 78.88  | 81.62   |
| 2             | 75.08    | 78.91  | 81.94   |
| 0, 1          | 69.68    | 74.83  | 78.75   |
| 1, 2          | 69.98    | 75.80  | 80.12   |
| 0, 2          | 68.56    | 74.38  | 78.13   |

1316 Table B.17: Performance on TinyFace when dropping individual or pairs of experts, and switching  
 1317 experts.

1318 We conducted experiments to show the performance across perturbations, and further performed  
 1319 experiments by dropping and switching experts, to strengthen our claim that the performance is  
 1320 achieved by the proposed design and not by increased capacity.

1321 **1. Routing is Stable Across Perturbations** To assess stability, we measure token-to-expert assign-  
 1322 ments under several common perturbations (FGSM, PGD, MIM). As shown in Table B.16 the routing  
 1323 distribution across the three experts remains highly stable:

- 1324
- 1325
- 1326
- 1327
- 1328
- 1329
- Under all perturbations, expert usage stays nearly uniform ( $\approx 33\%$  per expert), with  $< 2\%$  deviation across attacks.
  - Even stronger iterative attacks (PGD, MIM) do not cause expert collapse or oscillation. This consistency shows that the router is not sensitive to small input perturbations such as adversarial noise, and that token assignments converge to stable semantic regions, not noise-driven fluctuations. Therefore, routing behavior is robust and not an unstable byproduct of MoE capacity.

1330 **2. Controlled Expert Ablations Reveal Causal Contribution of Specialization** To evaluate whether  
 1331 FaceMoE’s performance stems from learned specialization rather than increased parameters, we run  
 1332 two sets of interventions as shown in Table B.17

1350  
1351  
1352  
1353  
1354  
1355  
1356  
1357  
1358  
1359  
1360  
1361  
1362  
1363  
1364  
1365  
1366  
1367  
1368  
1369  
1370  
1371  
1372  
1373  
1374  
1375  
1376  
1377  
1378  
1379  
1380  
1381  
1382  
1383  
1384  
1385  
1386  
1387  
1388  
1389  
1390  
1391  
1392  
1393  
1394  
1395  
1396  
1397  
1398  
1399  
1400  
1401  
1402  
1403

### (a) Dropping Individual Experts

Removing any one expert while keeping model capacity nearly unchanged produces only a small drop ( $\sim 1.0\%$ ) in Rank-1 relative to full FaceMoE:

- Expert 0 dropped: 75.05
- Expert 1 dropped: 75.10
- Expert 2 dropped: 75.08
- Full model: 76.18

This small but consistent degradation indicates that each expert contributes complementary information rather than redundant capacity. Since our router uses top- $k$  routing with  $k = 2$ , every token is always processed by two experts, ensuring that even after removing one expert, at least one of the originally assigned specialists is still active. This limits the performance drop while still revealing the non-redundant contribution of each expert.

### (b) Dropping Pairs of Experts (forcing single-expert routing)

When two experts are removed, routing collapses into a single FFN branch. This mirrors a standard transformer’s feed-forward layer capacity but accuracy drops drastically:

- Experts {0,1}: 69.68
- Experts {1,2}: 69.98
- Experts {0,2}: 68.56

The  $\sim 6 - 8\%$  absolute drop demonstrates that increased capacity alone cannot account for performance gains. If raw capacity were the cause, single-expert models (same depth, same FLOPs) would not collapse this sharply. Instead, this strongly supports specialization as the mechanism driving improvements.

Together, these interventions demonstrate a causal chain:

- Routing remains stable across perturbations (Table [B.16](#)).
- Experts are not interchangeable (Switch Expert  $\rightarrow$  significant drop).
- Experts are not redundant (dropping experts reduces performance).

Thus, improvements are not attributable to mere extra parameters but arise from structured expert specialization and resolution-aware routing, as intended in the design.

## C ADDITIONAL IMPLEMENTATION DETAILS

These are the additional details provided in addition to the ones mentioned in the main paper. Our base architecture for all experiments is the Swin-B (Swin Transformer - Base), which serves as the backbone for the FaceMoE model. To provide a rough estimate of computational requirements, we report training times for various configurations of the number of experts ( $N$ ) and the number of active experts per token ( $k$ ). These estimates are not intended for comparison, as the experiments were conducted on both NVIDIA A6000 (48GB) and A5000 (24GB) GPUs, leading to variability in runtime. Specifically, training times (in hours) are approximately: 49 for ( $N=2, k=1$ ), 57 for ( $N=3, k=1$ ), 81 for ( $N=3, k=2$ ), 120 for ( $N=3, k=3$ ), 49 for ( $N=4, k=1$ ), 50 for ( $N=4, k=2$ ), and 88 for ( $N=4, k=3$ ). To ensure a consistent and fair evaluation, we retrained the CosFace, ArcFace, and AdaFace baselines. For other baselines, we report results as presented in their respective original publications. All models and experiments are implemented in PyTorch and run across eight GPUs.

## D EXPERT ACTIVATION MAPS

To gain insight into how each expert specializes before and after TinyFace finetuning, we visualize their spatial activation patterns on a few facial images, as shown in Figure [6](#). Each row presents the activations of all  $k$  experts for a single input image.

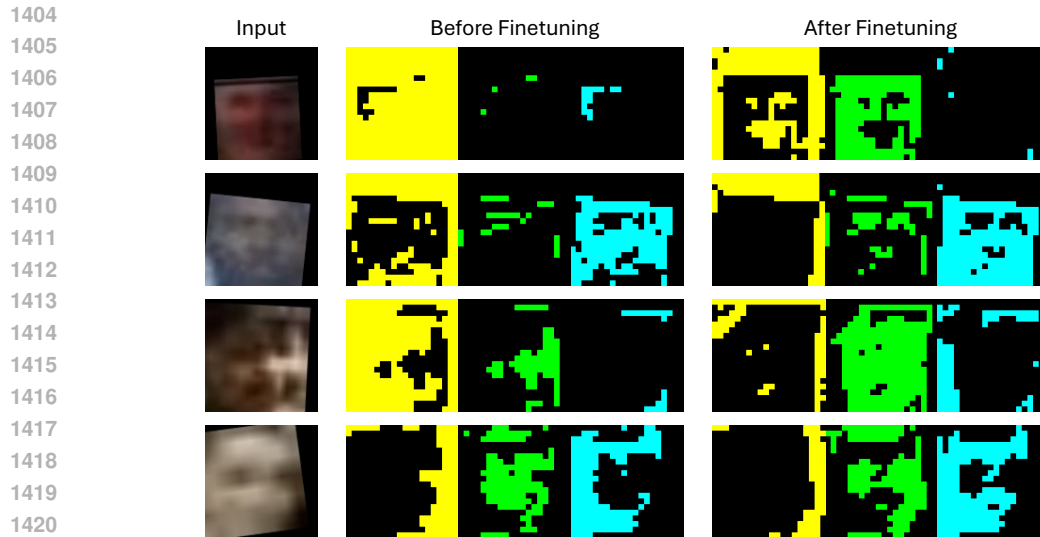

1422 **Figure 6: Expert activation maps before and after TinyFace finetuning.** Each row shows the  
 1423 spatial activations of all  $k$  experts on a input face image, before and after TinyFace finetuning.  
 1424 (Left) After pretraining on WebFace4M, experts exhibit broadly overlapping activations focusing  
 1425 on general facial regions (eyes, nose bridge, mouth outline). (Right) Following TinyFace finetuning,  
 1426 experts specialize on distinct, localized cues (eye corners, nose shape, cheek textures, etc.), yielding  
 1427 complementary attention patterns better suited to low-resolution face recognition.

1428

1429 **Pretraining on WebFace4M:** Before undergoing any adaptation to the TinyFace dataset, the model  
 1430 is pretrained for face recognition using the large-scale WebFace4M dataset. During this phase, all  
 1431 experts learn from a diverse collection of face images that vary in quality and pose, ranging from  
 1432 frontal to non-frontal views. As a result, their activation maps tend to highlight broad, coarse-grained  
 1433 regions, such as the overall outline of the face, the contours of the eyes, and the mouth area. There is  
 1434 substantial overlap between the activation patterns of different experts, suggesting that in the absence  
 1435 of further specialization, the experts tend to redundantly focus on the most generally discriminative  
 1436 facial features, such as the eyes and the bridge of the nose. These features remain consistently  
 1437 informative across a wide range of identities and imaging conditions.

1438 **After TinyFace Finetuning:** Following finetuning on the TinyFace dataset, which consists of low-  
 1439 resolution face crops extracted from unconstrained scenes, the experts begin to capture more localized  
 1440 and complementary features. The activation maps demonstrate that individual experts now respond  
 1441 to specific subregions or patterns. Some experts focus closely on areas such as the eye corners and  
 1442 eyelid textures, which are particularly important in low-resolution scenarios. Others concentrate on  
 1443 features such as the shape of the nose or the contours of the mouth. Additional experts respond to  
 1444 compound patterns, including shadows on the cheeks or the silhouettes of ears. This diversity in  
 1445 focus reflects the model’s adaptation to the characteristics of the TinyFace dataset. By distributing  
 1446 representational capacity across multiple experts, the network learns that fine-grained, region-specific  
 1447 textural cues are essential for distinguishing identities when the global structural features of the face  
 1448 are degraded due to low resolution.

1449 The transition from broadly overlapping activations in the WebFace4M pretraining phase to highly  
 1450 specialized and non-redundant activation maps after TinyFace finetuning highlights the effectiveness  
 1451 of the MoE architecture for domain adaptation. In low-resolution settings, relying on a single  
 1452 shared backbone imposes a trade-off between capturing global structures and preserving fine-grained  
 1453 local details. In contrast, the MoE framework enables different sub-networks to allocate their  
 1454 representational capacity to the most reliable cues for the target domain. First, the model demonstrates  
 1455 robustness to resolution degradation. Experts that are tuned to textural patterns, such as the micro-  
 1456 structure of skin around the eyes, retain their discriminative ability even when the overall facial shape  
 1457 becomes indistinct. Second, the architecture facilitates the integration of complementary evidence.  
 By aggregating signals from multiple specialized experts, the model can combine weak, localized  
 features into a coherent and robust identity representation. Finally, the approach allows for efficient

1458  
1459  
1460  
1461  
1462  
1463  
1464  
1465  
1466  
1467  
1468  
1469  
1470  
1471  
1472  
1473  
1474  
1475  
1476  
1477  
1478  
1479  
1480  
1481  
1482  
1483  
1484  
1485  
1486  
1487  
1488  
1489  
1490  
1491  
1492  
1493  
1494  
1495  
1496  
1497  
1498  
1499  
1500  
1501  
1502  
1503  
1504  
1505  
1506  
1507  
1508  
1509  
1510  
1511

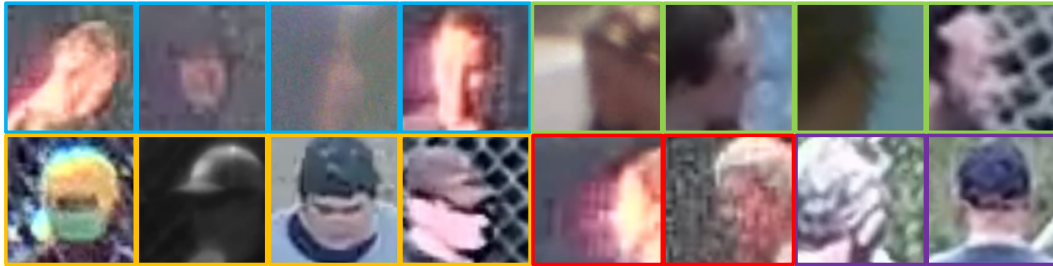

Figure 7: Failure Case Analysis of FaceMoE model on the BRIAR dataset.

adaptation. Only a subset of experts needs to specialize deeply in the new domain, while others can maintain their generalist knowledge from pretraining. This division of labor ensures a balanced trade-off between plasticity and stability.

*These activation patterns offer clear evidence that finetuning on low-resolution dataset induces functional specialization among experts, enabling the model to perform effectively in challenging, low-resolution face recognition tasks.*

## E FAILURE CASE ANALYSIS

To diagnose the remaining weaknesses of our FaceMoE model, we conducted a detailed examination of representative failure cases on the BRIAR probe set as shown in Figure 7. We identified five dominant scenarios that consistently lead to recognition errors. First, **extremely low-resolution** face crops, typically below approximately  $8 \times 8$  pixels, contain too little texture or shape information for reliable matching. This causes the expert ensemble’s activations to become noisy and prone to errors. Second, **extreme head poses**, such as profiles or tilts greater than 60 degrees, often result in facial landmarks moving outside the visible region. In these situations, experts trained on frontal-view patterns perform poorly. Third, **heavy occlusion** caused by items like masks, caps, or scarves can obscure important facial regions. As a result, the experts struggle to extract meaningful unoccluded features, which increases confusion with other identities. Fourth, **atmospheric turbulence**, including visual distortions such as heat shimmer and motion blur that are common in long-range surveillance, disrupts the spatial consistency of facial features. These effects fragment the activation maps and reduce the model’s ability to form coherent representations. Finally, **non-frontal views**, where subjects never present a clear frontal face during a sequence, prevent the model from obtaining a stable canonical reference. Consequently, even viewpoint-specialized experts are unable to generate consistent embeddings, leading to recognition failures. These failure modes illustrate that, while FaceMoE is effective in handling low-resolution images, it remains vulnerable to conditions that obscure or dynamically distort facial information.

To evaluate the routing mechanism under extreme degradation, we visualize the activation maps for each expert in Figure 8. The figure contrasts success and failure cases by illustrating how activation patterns behave under challenging visual conditions. In successful examples, despite blur or moderate pose variations, the experts activate coherently around semantically meaningful facial regions, such as landmarks, contours, and stable low-frequency structures, allowing the network to extract sufficient identity cues. In failure cases, however, extreme pose, over/under-exposure, or severe occlusion disrupt this specialization: activation maps become diffuse, fragmented, or erroneously concentrated in non-informative regions. As shown in the failed inputs, experts often shift their focus to background patches or large smooth areas lacking discriminative detail, indicating that the model can no longer reliably localize or route tokens to the appropriate experts. This divergence between structured and unstable activation patterns highlights the sensitivity of low-resolution recognition models to severe degradations and explains why extreme angles, overexposure, and occlusion frequently lead to identity misclassification and degraded recognition performance.

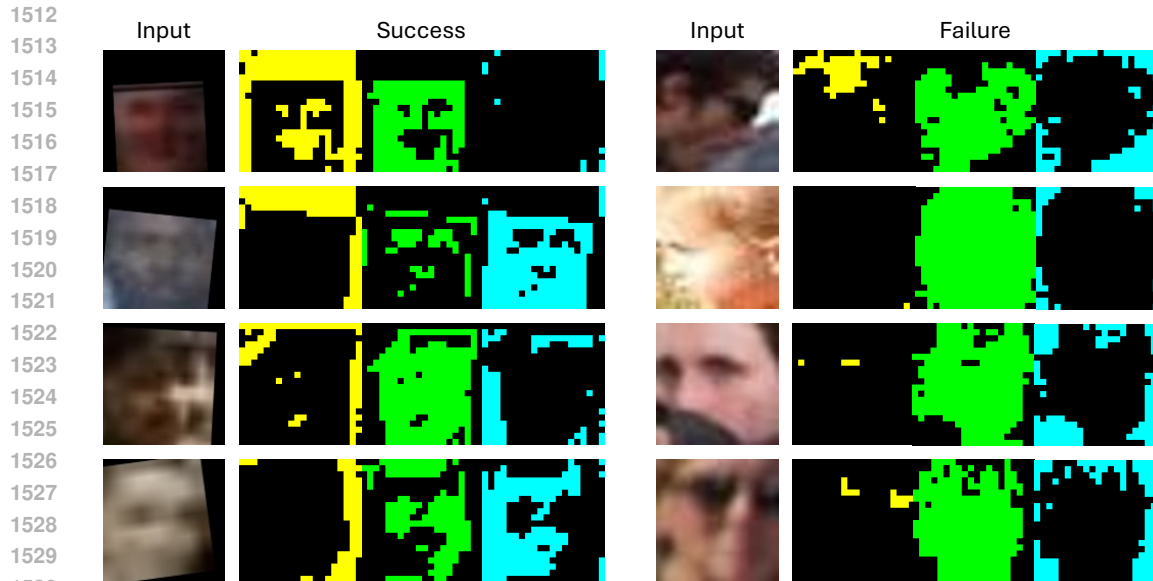

1531

1532 Figure 8: Comparison of activation maps for success and failure cases.

1533

1534

## 1535 F LIMITATIONS AND FUTURE WORK

1536

1537 Our training data, WebFace4M [Zhu et al. \(2021\)](#), is predominantly composed of Western, young, and  
 1538 light-skinned subjects. We have not yet incorporated balanced sampling, debiasing loss functions, or  
 1539 demographic-specific experts, which means the model may amplify existing biases. While Mixture-  
 1540 of-Experts (MoE) architectures are typically used to scale model capacity efficiently, their application  
 1541 in face recognition introduces unique challenges. We observe that increasing the number of experts  
 1542 ( $N$ ) can lead to over-fragmentation and routing instability, which may negatively affect performance.  
 1543 Addressing these issues remains an important area for future work.

1544

## 1545 G SOCIAL IMPACT STATEMENT

1546

1547 The proposed work, FaceMoE, presents a transformer-based Mixture of Experts (MoE) architecture  
 1548 that significantly advances low-resolution face recognition (LR-FR). FaceMoE enhances recogni-  
 1549 tion performance on degraded or surveillance-quality imagery, offering the potential to improve  
 1550 operational effectiveness in domains such as public safety, disaster response, border control, and  
 1551 missing persons investigations. These improvements enable faster and more accurate identification in  
 1552 scenarios where traditional face recognition systems often underperform, particularly in time-sensitive  
 1553 or resource-constrained environments.

1554 Beyond technical improvements, the broader societal implications of these advancements merit  
 1555 careful consideration. As face recognition systems become increasingly capable of identifying  
 1556 individuals from poor-quality images, their deployment in everyday settings such as public transit,  
 1557 city surveillance, or consumer electronics is likely to accelerate. This trend could contribute to  
 1558 a societal shift in which continuous identity tracking becomes normalized, potentially eroding  
 1559 expectations of anonymity and reshaping perceptions of privacy in public spaces. The widespread  
 1560 presence of such systems may also influence individual behavior and social engagement, particularly  
 1561 in communities that are already subject to heightened surveillance.

1562 Furthermore, access to advanced recognition systems like FaceMoE may not be distributed evenly.  
 1563 Organizations with greater financial and technical resources are more likely to benefit from such  
 1564 technologies, which could deepen existing disparities in areas such as law enforcement, national  
 1565 security, and institutional capacity. Public trust in face recognition systems depends not only on  
 their technical performance but also on how transparently and equitably they are implemented. To

1566 ensure that FaceMoE contributes positively to society, its deployment in real-world applications must  
1567 be supported by inclusive access, meaningful public dialogue, and policies that emphasize fairness,  
1568 accountability, and the protection of civil liberties.  
1569

1570

1571

1572

1573

1574

1575

1576

1577

1578

1579

1580

1581

1582

1583

1584

1585

1586

1587

1588

1589

1590

1591

1592

1593

1594

1595

1596

1597

1598

1599

1600

1601

1602

1603

1604

1605

1606

1607

1608

1609

1610

1611

1612

1613

1614

1615

1616

1617

1618

1619
